# Supplementary material for: Comparative Genomic Analysis of Lactiplantibacillus plantarum Isolated from Different Niches
Source: Genes (Basel). 2021 Feb 8;12(2):241. doi: 10.3390/genes12020241 (PMC7914981; doi:10.3390/genes12020241)
Supplement: Supplementary file 1 [file genes-12-00241-s001.xlsx]

## Sheet: Sheet1
	Table S1. Genomic information and sample information of 133 Lactiplantibacillus plantarum strains
	Strains	Genomic size (Mb)	Number of genes	GC content (%)	Source of isolation	Specific information	Area	SRA accession number
	DHLJZD13L6	3.14	3049	46.33	fermented sauce	soybean paste, 8 months	Heilongjiang	SRR12560033
	DHLJZD16L2	3.4	3357	45.43	fermented sauce	soy chili paste, 3 months	Heilongjiang	SRR12560032
	DHLJZD18L5	3.27	3163	45.62	fermented sauce	chili paste, 3 months	Heilongjiang	SRR12560030
	DHLJZD19L5	3.19	3119	45.65	fermented sauce	soybean paste, 7.5 months	Heilongjiang	SRR12560029
	DHLJZD20L2	3.16	3076	45.68	fermented sauce	chili paste, 3 months	Heilongjiang	SRR12560028
	DHLJZD21L1	3.2	3127	45.62	fermented sauce	chives flower sauce, 5 months	Heilongjiang	SRR12560027
	DHLJZD23L2	3.16	3079	45.67	fermented sauce	soybean paste, 8 months	Heilongjiang	SRR12560026
	DHLJZD24L1	3.34	3257	45.53	fermented sauce	soybean paste, 8 months	Heilongjiang	SRR12559890
	DHLJZD25L1	3.39	3293	45.45	fermented sauce	soybean paste, 8 months	Heilongjiang	SRR12559889
	DHLJZD26L1	3.32	3230	45.61	fermented sauce	soybean paste, 20 months	Heilongjiang	SRR12559888
	DHLJZD29L2	3.16	3079	45.6	fermented sauce	soybean paste, 8 months	Heilongjiang	SRR12559887
	VCQDDK5M2	3.31	3216	45.48	pickles	cowpea, pickled pepper, 10 years	Chongqing	SRR12559740
	VCQDJ1M5	3.33	3209	45.45	pickles	cowpea, radish, 15 years	Chongqing	SRR12559739
	VCQKX1M2	3.25	3124	45.6	pickles	radish, pickled pepper, 15 years	Chongqing	SRR12559738
	VCQLP6M2	3.24	3124	45.6	pickles	radish, pickled pepper, 2 years	Chongqing	SRR12559737
	VCQWS1M2	3.25	3127	45.6	pickles	radish, 2 years	Chongqing	SRR12559736
	VCQYB1M3	3.32	3199	45.45	pickles	ginger, green and red pepper, 3 years	Chongqing	SRR12559735
	VCQYC1M1	3.32	3197	45.46	pickles	carrot, 15 years	Chongqing	SRR12559734
	VCQYD1M3	3.25	3127	45.6	pickles	Radish,pickled pepper, 5 years	Chongqing	SRR12559733
	VCQZX1M2	3.32	3199	45.45	pickles	carrot, chili, 8 years	Chongqing	SRR12559732
	VCQBB3-125-L8	3.34	3221	45.45	pickles	pickled pepper, ginger, 4 years	Chongqing	SRR12559741
	VHuNHHMY10L1	3.31	3324	45.62	pickles	red vinegar soaked carrot, 7 days	Hunan	SRR12559727
	VHuNHHMY12L1	3.31	3258	45.62	pickles	pickled cowpea	Hunan	SRR12559726
	VHuNHHMY13L2	3.5	3251	45.64	pickles	bubble eggplant	Hunan	SRR12559725
	VHuNHHMY2L1	3.23	3155	45.54	pickles	pickle, 20 days	Hunan	SRR12559730
	VHuNHHMY3L2	3.33	3204	45.5	pickles	pickle, 2 days	Hunan	SRR12559729
	VHuNHHMY9L1	3.5	2931	46.55	pickles	green, red pepper, soybean	Hunan	SRR12559728
	VJLHD11L1	3.44	3416	45.42	pickles	pickles, 3 months	Jilin	SRR12559718
	VJLHD12L4	3.33	3229	45.39	pickles	willow pickles, 3 months	Jilin	SRR12559717
	VJLHD14L1	3.34	3270	45.44	pickles	kimchi, 3 days	Jilin	SRR12559716
	VJLHD16L1	3.34	3329	45.59	pickles	pickles, 3 months	Jilin	SRR12559715
	VJLHD18L1	3.35	3282	45.45	pickles	coriander, 3 months	Jilin	SRR12559714
	VJLHD4L1	3.3	3252	45.45	pickles	pickles, 12 months	Jilin	SRR12559724
	VJLHD5L1	3.38	3318	45.52	pickles	soy, cucumber, 12 months	Jilin	SRR12559723
	VJLHD6L1	3.31	3222	45.52	pickles	sauerkraut, 3 months	Jilin	SRR12559722
	VJLHD9L1	3.35	3282	45.45	pickles	sauerkraut, 8 months	Jilin	SRR12559719
	VJXSRYG1L1	3.24	3118	45.54	pickles	pickles	Jiangxi	SRR12559713
	VJXSRYG2L1	3.23	3115	45.54	pickles	pickles	Jiangxi	SRR12559712
	VSCDJY12L1	3.5	3464	45.16	pickles	pickles	Sichuan	SRR12559710
	VSCDJY5L5	3.44	3338	45.47	pickles	pickles	Sichuan	SRR12559711
	VSCPS1L3	3.38	3342	45.44	pickles	pickles	Sichuan	SRR12559708
	VSCQS6M1	3.26	3153	45.46	pickles	pickles	Sichuan	SRR12559707
	VSCQS7M1	3.27	3208	45.48	pickles	pickles	Sichuan	SRR12559706
	FCQHC24L1	3.47	3376	45.32	feces	female, 68 years old, Han	Chongqing	SRR12559886
	FCQHC25L4	3.24	3162	45.56	feces	female, 74 years old, Han	Chongqing	SRR12559884
	FCQNA23M1	3.34	3247	45.54	feces	female, 30 years old, Han	Chongqing	SRR12559883
	FCQNA27M4	3.22	3117	45.62	feces	female, 73 years old, Han	Chongqing	SRR12559882
	FCQNA28M4	3.45	3363	45.34	feces	female, 70 years old, Han	Chongqing	SRR12559881
	FCQNA29M3	3.27	3157	45.6	feces	fmale, 26 years old, Han	Chongqing	SRR12559880
	FCQNA30M6	3.16	3069	45.73	feces	female, 84 years old, Han	Chongqing	SRR12559879
	FCQNA31M2	3.36	3246	45.41	feces	male, 75 years old, Han	Chongqing	SRR12559878
	FCQNA32M4	3.29	3210	45.44	feces	female, 60 years old, Han	Chongqing	SRR12559877
	FCQNA34M6	3.33	3316	45.56	feces	male, 62 years old, Han	Chongqing	SRR12559876
	FCQNA35M1	3.36	3262	45.46	feces	female, 58 years old, Han	Chongqing	SRR12559875
	FGDLZ10M8	3.34	3228	45.5	feces	male, 8 years old	Guangdong	SRR12559866
	FGDLZ1M5	3.26	3085	45.52	feces	female, 75 years old	Guangdong	SRR12559871
	FGDLZ2M10	3.26	3091	45.51	feces	male, 10 years old	Guangdong	SRR12559870
	FGDLZ5M7	3.9	2767	45.59	feces	female, 66 years old	Guangdong	SRR12559867
	FGDLZ6M2	3.34	3236	45.56	feces	female, 8 years old	Guangdong	SRR12559869
	FGDLZ8M3	3.33	3220	45.52	feces	male, 38 years old	Guangdong	SRR12559868
	FGSYC22-5-L2	3.24	3150	45.71	feces	male, 62 years old, Han	Gansu	SRR12559865
	FGSYC67L2	3.34	3338	45.49	feces	male, 18 years old, Han	Gansu	SRR12559864
	FGSZY33L3	3.3	3321	45.52	feces	male, 8 years old, Zang	Gansu	SRR12559862
	FHeNa15018G3	3.12	3160	45.51	feces	female, 54 years old	Gansu	SRR12559861
	FFJLY44L1	3.3	3223	45.55	feces	female	Fujian	SRR12559873
	FFJNDD7M7	3.18	3214	45.45	feces	female, 37 years old, Han	Fujian	SRR12559872
	FNXYCHL89L1	3.29	3278	45.57	feces	female, 28 years old, Han	Gansu	SRR12559474
	FNXYCHL89L5	3.43	3348	45.48	feces	female, 38 years old	Gansu	SRR12559473
	FHuNHHMY13M5	3.53	3487	45.32	feces	female, 49 years old	Hunan	SRR12559859
	FHuNHHMY22M4	3.16	3080	46.21	feces	female, 46 years old	Hunan	SRR12559858
	FHuNHHMY24M8	3.13	3034	45.61	feces	female, 52 years old, Miao	Hunan	SRR12559491
	FHuNHHMY6M5	3.5	3435	45.29	feces	male, 63 years old	Hunan	SRR12559860
	FHuNHHMY71L1	3.23	3146	45.53	feces	male, 22 years old, Miao	Hunan	SRR12559490
	FJLHD20M4	3.3	3187	45.45	feces	male, 4 years old, Han	Jilin	SRR12559484
	FJLHD2M9	3.29	3155	45.54	feces	female, 48 years old	Jilin	SRR12559489
	FJLHD37M1	3.27	3182	45.6	feces	female, 50 years old	Jilin	SRR12559483
	FJLHD46M1	3.48	3411	45.25	feces	male, 57 years old	Jilin	SRR12559482
	FJLHD48M1	3.44	3355	45.26	feces	male, 57 years old	Jilin	SRR12559481
	FJLHD4M3	3.33	3227	45.51	feces	male, 56 years old, Han	Jilin	SRR12559488
	FJLHD57M1	3.49	3388	45.42	feces	female, 34 years old	Jilin	SRR12559480
	FJLHD9M2	3.28	3152	45.57	feces	male, 48 years old, Han	Jilin	SRR12559487
	FJLHD9M9	3.28	3152	45.57	feces	female, 48 years old, Han	Jilin	SRR12559485
	FJSCZD4L4	3.27	3148	45.61	feces	male, 78 years old, Han	Jiangsu	SRR12559479
	FJSCZD5L9	3.27	3149	45.61	feces	male, 10 years old, Han	Jiangsu	SRR12559478
	FJSWX14L1	3.18	3069	45.73	feces	male, 65 years old	Jiangsu	SRR12559476
	FJSNJPK4G1	3.32	3371	45.54	feces	female, 31 years old	Jiangsu	SRR12559477
	FSCDJY69L1	3.36	3296	45.38	feces	female, 83 years old	Sichuan	SRR12559472
	FSCDJY73L1	3.36	3296	45.38	feces	female, 63 years old	Sichuan	SRR12559471
	FSCDJY76L1	3.13	3034	46.29	feces	male, 40 years old	Sichuan	SRR12559470
	FSCDJY92L1	3.39	3316	45.31	feces	female, 39 years old	Sichuan	SRR12559469
	FSCDJY93L1	3.43	3395	45.31	feces	male, 71 years old	Sichuan	SRR12559468
	FSCPS35L5	3.19	3090	45.67	feces	male, 10 years old, Han	Sichuan	SRR12559464
	FSCPS6L4	3.28	3157	45.54	feces	female, 65 years old	Sichuan	SRR12559467
	FSCPS8L3	3.47	3386	45.27	feces	female, 2 years and 6 months, Han	Sichuan	SRR12559465
	FXJCJ22M3	3.46	3361	45.42	feces	male, 17 months, Hui	Xinjiang	SRR12559462
	FXJCJ25M3	2.94	2846	46.01	feces	female, 53 years old, Han	Xinjiang	SRR12559461
	FXJCJ26M6	3.26	3152	45.52	feces	female, 56 years old, Han	Xinjiang	SRR12559460
	FXJKS16M1	3.4	3309	45.47	feces	male, 32 years old	Xinjiang	SRR12559459
	FXJKS18M4	3.32	3217	45.4	feces	male, 11 years old	Xinjiang	SRR12559458
	FXJKS21M3	3.26	3146	46.08	feces	male, 2 years old	Xinjiang	SRR12559759
	FXJKS33M3	3.44	3386	45.31	feces	male, 65 years old	Xinjiang	SRR12559758
	FXJSW29M6	3.18	3058	45.57	feces	female, 58 years old, Han	Xinjiang	SRR12559757
	FXJWS11M2	3.29	3172	45.63	feces	female, 55 years old	Xinjiang	SRR12559752
	FXJWS1M3	3.46	3353	45.37	feces	female, 58 years old, Han	Xinjiang	SRR12559756
	FXJWS5M4	3.37	3261	45.34	feces	male, 38 years old	Xinjiang	SRR12559755
	FZJHZD26L2	3.37	3297	45.54	feces	male, 38 years old, Han	Zhejiang	SRR12559751
	FZJTZ16M7	3.27	3209	45.57	feces	female, 19 years old, Han	Zhejiang	SRR12559750
	FZJTZ19M1	3.34	3262	45.47	feces	female, 90 years old	Zhejiang	SRR12559749
	FZJTZ20M1	3.44	3397	45.35	feces	male, 83 years old	Zhejiang	SRR12559748
	FZJTZ29M8	3.1	3038	46.15	feces	male, 42 years old	Zhejiang	SRR12559747
	FZJTZ31M7	3.39	3291	45.47	feces	female, 44 years old, Han	Zhejiang	SRR12559746
	FZJTZ60M3	3.42	3311	45.42	feces	female, 78 years old, Han	Zhejiang	SRR12559745
	FZJTZ61M2	3.25	3176	45.58	feces	male, 75 years old, Han	Zhejiang	SRR12559744
	FZJTZ63M2	3.34	3230	45.5	feces	female, 37 years old, Han	Zhejiang	SRR12559743
	LP-ZS2058	3.2	3077	44.7	sauerkraut	NCBI	China	/
	LP-ZJ316	3.3	3209	44.45	baby droppings	NCBI	China	/
	LP-Zhang-LL	2.95	2860	44.9	brewing	NCBI	China	/
	LP-WCFS1	3.35	3174	44.45	saliva	NCBI	Netherlands	/
	LP-ST-III	3.31	3194	44.5	pickles	NCBI	China	/
	LP-P-8	3.25	3194	44.58	dairy products	NCBI	China	/
	LP-MF1278	3.58	3499	44.22	fermented sausage	NCBI	Norway	/
	LP-LZ227	3.43	3393	44.34	raw milk	NCBI	China	/
	LP-LZ206	3.26	3192	44.5	raw milk	NCBI	China	/
	LP-LZ95	3.32	3232	44.49	baby droppings	NCBI	China	/
	LP-LY-78	3.13	3023	44.77	pickles	NCBI	China	/
	LP-KP	3.69	3650	44.08	drosophila	NCBI	Canada	/
	LP-JDM1	3.2	3084	44.7	silage	NCBI	China	/
	LP-JBE245	3.26	3177	44.5	fermented bean paste	NCBI	Korea	/
	LP-HFC8	3.41	3433	44.33	feces	NCBI	India	/
	LP-5-2	3.24	3148	44.7	fermented tamarind pulp	NCBI	China	/
	LP-CAUH2	3.27	3188	44.55	pickles	NCBI	China	/
	LP-B21	3.31	3189	44.45	fermented sausage	NCBI	Australia	/
	LP-10CH	3.31	3192	44.5	cheese	NCBI	England	/
